# Supplementary material for: An Econometric Assessment of the Impact of Exchange Rate Depreciation on Inflation in Nigeria (1981-2017)
Source: Preprints.org preprint supplement (doi:10.20944/preprints201901.0289.v1), 2019-01-29
Supplement: Supplementary file 3 [file supplementary]

## Sheet: WB_Datasets
Year	GDP per capita (current US$)	Official Exchange rate (LCU per US$)	General government total expenditure (current US$)	Broad money growth (annual %)	Inflation, consumer prices (annual %)
1981	809.147	0.617708	8.95436e+09	5.89997	20.8128
1982	663.425	0.673461	8.05201e+09	9.54531	7.69775
1983	446.143	0.72441	5.43681e+09	14.0216	23.2123
1984	349.713	0.766527	3.74797e+09	11.6028	17.8205
1985	345.328	0.893774	3.67616e+09	8.99274	7.43534
1986	241.457	1.75452	2.60705e+09	1.95309	5.71715
1987	273.471	4.01604	1.73614e+09	22.4112	11.2903
1988	257.292	4.53697	1.77929e+09	32.9132	54.5112
1989	260.987	7.36473	1.31987e+09	12.928	50.4667
1990	322.841	8.03829	1.52692e+09	32.701	7.3644
1991	280.302	9.90949	1.32397e+09	37.3802	13.007
1992	292.361	17.2984	1.74689e+09	63.2603	44.5888
1993	153.647	22.0654	1.03304e+09	53.758	57.1653
1994	171.67	21.996	3.24539e+09	34.4951	57.0317
1995	264.296	21.8953	3.44994e+09	19.4117	72.8355
1996	315.967	21.8844	3504805125	16.1782	29.2683
1997	315.552	21.8861	4.65589e+09	16.039	8.52987
1998	274.987	21.886	4.47213e+09	22.3178	9.99638
1999	300.609	92.3381	2.50484e+09	33.1211	6.61837
2000	379.119	101.697	3.86979e+09	48.0675	6.93329
2001	351.8	111.231	3.62402e+09	26.3768	18.8736
2002	459.457	120.578	3.96666e+09	18.8211	12.8766
2003	512.651	129.222	3.48616e+09	13.5114	14.0318
2004	648.815	132.888	5.9134e+09	20.677	14.998
2005	807.894	131.274	7.64128e+09	22.6036	17.8635
2006	1019.74	128.652	9.97579e+09	36.3507	8.23953
2007	1136.83	125.808	1.69449e+10	64.9246	5.38222
2008	1383.89	118.546	2.42216e+10	58.5344	11.578
2009	1097.66	148.902	2.19603e+10	17.2146	11.5377
2010	2327.32	150.298	3.21504e+10	6.79129	13.7202
2011	2527.94	153.862	3.49748e+10	12.9918	10.84
2012	2755.3	157.499	3.77984e+10	20.5999	12.2178
2013	2996.96	157.311	3.6847e+10	9.6575	8.47583
2014	3221.68	158.553	3.67505e+10	4.43808	8.06249
2015	2655.16	192.44	2.8552e+10	3.00399	9.00939
2016	2175.67	253.492	2.17876e+10	11.5524	15.6753
2017	1968.56	305.79	2.82188e+10	17.0843	16.5235
